# Supplementary material for: India’s Energy and Fiscal Transition
Source: publisher site journal article supplement (doi:10.1515/jgd-2023-0101), 2024-11-13
Supplement: Supplementary file 1 [file j_jgd-2023-0101_suppl_001.docx]

**Online Appendix**

**Table 1: Tax Structure**

| **S. No.** | **Commodity** | **Basic Excise Duty** | **Special Additional Excise Duty** | **Road & Infrastructure Cess** | **Total Central Excise Duty** |
| --- | --- | --- | --- | --- | --- |
| 1 | Crude Petroleum Oil | Rs 1 per ton excise duty + Cess @20% + Rs.50/ MT as NCCD | -- | -- | Rs 1 per tonne excise duty + Cess @20% + Rs.50/ MT as NCCD |
| 2 | Natural Gas  [other than compressed natural gas] | Nil | -- | -- | Nil |
| 3 | Compressed Natural Gas | 14% | -- | -- | 14% |
| 4 | Petrol (Unbranded) | Rs. 2.98/ltr | Rs. 12.00/litre | Rs. 18.00/litre | Rs. 32.98/litre |
| 5 | High Speed Diesel (Unbranded) | Rs. 4.83/litre | Rs.9.00/litre | Rs. 18.00/litre | Rs. 31.83/litre |
| 6 | Air Turbine Fuel | 11%  [2% for RCS flights] | -- | -- | 11%  [2% for RCS flights] |

Source: Ministry of Petroleum & Natural Gas, Posted On: 19 SEP 2020 3:54PM by PIB Delhi, <https://pib.gov.in/PressReleasePage.aspx?PRID=1656647>

Note - NCCD: National Calamity Contingent Duty; RCS: Regional Connectivity Scheme

**Table 2: GST rates**

| **Commodity** | | **GST** |
| --- | --- | --- |
| LPG | Domestic | 5.00% |
| Non - Domestic | 18.00% |
| Kerosene | PDS | 5.00% |
| Non PDS | 18.00% |
| Naphtha | Fertilizer | 18.00% |
| Non- Fertilizer | 18.00% |
| Bitumen & Asphalt, furnace oil, Lube, Pet coke etc |  | 18.00% |

Source: Ministry of Petroleum & Natural Gas, Posted On: 19 SEP 2020 3:54PM by PIB Delhi, <https://pib.gov.in/PressReleasePage.aspx?PRID=1656647>

**Table 3: Names of PSEs generating revenues for Government from Petroleum**

| **Names** |
| --- |
| **Public Sector Enterprises of PSEs** |
| Balmer Lawrie & Co. Limited |
| Bharat Petroleum Corporation Limited |
| Biecco Lawrie Co. Limited |
| Chennai Petroleum Corporation Limited |
| Engineers India Limited |
| Gas Authority of India Limited |
| Hindustan Petroleum Corporation Limited |
| Indian Oil Corporation Limited |
| Numaligarh Refinery Limited |
| Oil India Limited |
| Oil & Natural Gas Corporation Limited |
| **Subsidiaries of PSEs** |
| O.N.G.C. Videsh Limited |
| Mangalore Refinery and Petrochemicals Limited |
| **Non-PSEs Earning revenues from Petroleum** |
| Centre For High Technology |
| Directorate General of Hydrocarbons. |
| Oil Industry Development Board. |
| Oil Industry Safety Directorate |
| O.N.G.C. VIDESH LIMITED |
| Petroleum Conservation Research Association. |
| Petroleum Planning And Analysis Cell |
| Petroleum Federation of India (PetroFed) |
| Petroleum and Natural Gas Regulatory Board |

Source: Ministry of Petroleum and Natural Gas. Downloaded from https://mopng.gov.in/en/about-us/psu-subsidiaries-and-others

**Table 4: Sources of Revenue from Oil and Natural Gas**

| **Contribution of Petroleum Sector to Exchequer (Rs billion)** | | | |
| --- | --- | --- | --- |
|  |  | **2018-19** | **2019-20** |
| **1. Contribution to Central Exchequer** | | **3,480.41** | **3,343.15** |
|  | **Tax/ Duties on Crude oil & Petroleum products** | **2,798.47** | **2,875.40** |
|  | *of which* |  |  |
|  | Cess on Crude Oil | 177.41 | 147.89 |
|  | Royalty on Crude Oil / Natural Gas | 60.62 | 56.02 |
|  | Customs Duty | 160.35 | 229.27 |
|  | Excise Duty | 2,143.69 | 2,230.57 |
|  | IGST and CGST | 239.16 | 199.30 |
|  | **Dividend to Government/ Income tax etc.** | **681.94** | **467.75** |
|  | *of which* |  |  |
|  | Corporate/ Income Tax | 385.61 | 231.34 |
|  | Dividend income to Central Govt. | 155.25 | 122.70 |
| **2. Contribution to State Exchequer** | | **2,275.91** | **2,210.56** |
|  | **Tax/ Duties on Crude & Petroleum products** | **2,273.96** | **2,208.41** |
|  | *of which* |  |  |
|  | Royalty on Crude Oil / Natural Gas | 133.71 | 118.82 |
|  | Sales Tax/ VAT on POL Products | 2,012.65 | 2,004.93 |
|  | SGST/UTGST | 79.61 | 73.45 |
|  | **Dividend to Government/ Direct tax etc.** | **1.95** | **2.15** |
| **Total Contribution of Petroleum Sector to Exchequer** | | **5,756.32** | **5,553.70** |

Source: PPAC

**Table 5: Sources of Revenue from Coal (Rs billion)**

| **Revenue Components** | **2018-19** | **2019-20** |
| --- | --- | --- |
| Royalty | 112.77 | 106.82 |
| DMF | 28.80 | 31.23 |
| NMET | 2.28 | 2.14 |
| CGST | 14.25 | 13.65 |
| SGST | 14.12 | 13.64 |
| IGST | 8.99 | 1.68 |
| GST compensation cess | 240.45 | 231.66 |
| Cess on coal | 16.75 | 18.59 |
| State Sale Tax/VAT | .07 | .12 |
| Central Sale Tax | .07 | .20 |
| Central Excise Duty | .07 | .21 |
| Entry Tax | .04 | 0 |
| other | 9.60 | 10.64 |
| Total | 448.26 | 430.59 |

Source: Annual reports, Coal India

Note: Data for Coal India Limited and its subsidiaries

**Table 6: Sources of Data**

| **Fossil** | **Data Sources** |
| --- | --- |
| Oil & Natural GAS | All aggregate and disaggregated data for both central and state government can be obtained from Petroleum Planning and Analysis Cell (PPAC). |
| Coal & Lignite | 1. Annual Reports Coal India Limited 2. Annual reports of SCCL. 3. Major Statistics (Export/Import) from Ministry of Coal |

**Table 7: Conversion Factors**

| Energy Sources | Conversion |
| --- | --- |
| One million tonnes of Coal | 15.70 petajoules of energy |
| One million tonnes of oil equivalent (MTOE) | 41.87 petajoules of energy |
| One billion cubic metre of natural gas | 38.52 petajoules of energy |
| One million cubic metre of natural gas | 38.52 terajoules of energy |
|  |  |

**Table 8: Methodology**

- We use the energy requirement forecast from IEA for 2030 and 2040 under three different scenarios.
- Converted the energy required into quantity required using conversion parameters from MoSPI.
- Using the revenue received on (both tax and non-tax) by both centre and state government in 2019-20, we calculate the revenue received per unit of usage. All the calculation was done separately for ‘coal’ and ‘oil &natural gas’
- Using the projected quantity usage and revenue per unit in 2019-20, we project the tax revenue (Tax, duties and cesses) and non-tax revenue (Royalty and dividends) for centre and state government in 2030 and 2040.
- We assume 2 scenarios of GDP growth- one as 7% and other as 10%. Keeping the ratio of tax revenue to GDP constant, we calculate the project tax to GDP ratio for 2030 and 2040. We have presented the 10% growth result in the paper.
- Further, we also assume that the revenue from these as a share of total government revenue remains same over the years. Using the average share of revenue from coal, oil and natural gas for last 10 years separately for tax revenue and non-tax revenue (for centre and states), we project the ratios for 2030 and 2040 as well.

**Table 9: Petroleum based revenue for different States and UTs**

| **S.No.** | **State/UT** | **Revenue in Rs. million** | | |
| --- | --- | --- | --- | --- |
|  |  | 2018-19 | 2019-20 | 2020-21 |
| 1 | Andaman & Nicobar Islands | 926.4 | 942 | 738.7 |
| 2 | Andhra Pradesh | 110413.3 | 103235.4 | 111253.2 |
| 3 | Arunachal Pradesh | 551 | 265.5 | 1045.2 |
| 4 | Assam | 44379.7 | 41162.6 | 40789.4 |
| 5 | Bihar | 67431.3 | 63826.8 | 59758.5 |
| 6 | Chandigarh | 630.2 | 610.9 | 610.6 |
| 7 | Chhattisgarh | 40043.7 | 38862.9 | 41214 |
| 8 | Dadra & Nagar Haveli and Daman & Diu | 137.2 | 218.3 | 217.2 |
| 9 | Delhi | 44302.4 | 38837.9 | 26893.1 |
| 10 | Goa | 6973 | 7627.2 | 6920.9 |
| 11 | Gujarat | 182881.8 | 171379 | 167069.3 |
| 12 | Haryana | 89445.6 | 83329.1 | 84519 |
| 13 | Himachal Pradesh | 3673 | 4446.5 | 8882.4 |
| 14 | Jammu & Kashmir | 14698.5 | 14756.2 | 14830 |
| 15 | Jharkhand | 28084.1 | 33122.3 | 36312.9 |
| 16 | Karnataka | 147729.7 | 156493.6 | 157364.3 |
| 17 | Kerala | 81407.3 | 82450.6 | 70602.4 |
| 18 | Ladakh | 0 | 149.5 | 501 |
| 19 | Lakshadweep | 0 | 1.6 | 0 |
| 20 | Madhya Pradesh | 95717.1 | 108179 | 119753.7 |
| 21 | Maharashtra | 284625.4 | 279173.8 | 263625.7 |
| 22 | Manipur | 1820.4 | 1938.2 | 2661.7 |
| 23 | Meghalaya | 07 | 03.5 | 010 |
| 24 | Mizoram | 886 | 921.3 | 848.8 |
| 25 | Nagaland | 976 | 1162 | 1488.1 |
| 26 | Odisha | 57523.5 | 56874.4 | 64191.1 |
| 27 | Puducherry | 91.9 | 58.6 | 108.4 |
| 28 | Punjab | 66915.3 | 56759.7 | 63346.1 |
| 29 | Rajasthan | 129190 | 134946.7 | 152631 |
| 30 | Sikkim | 1360.2 | 1295.2 | 1108.1 |
| 31 | Tamil Nadu | 187846.8 | 187367.9 | 175024.3 |
| 32 | Telangana | 100556.2 | 100660.5 | 87132 |
| 33 | Tripura | 2968.8 | 4015 | 4829.2 |
| 34 | Uttar Pradesh | 197838 | 207309.1 | 225587.2 |
| 35 | Uttarakhand | 16014.8 | 15014.2 | 15320 |
| 36 | West Bengal | 84109.1 | 80876.1 | 83333 |
|  | TOTAL | 2092262 | 2078380 | 2090580 |

Note: - These revenues are sum of sale tax and SGST/UTGST. Source: - PPAC

**Figure A1: Energy generation and CO2 emission**

**Figure A2: India’s Total Coal Imports**

Source: https://coal.gov.in/major-statistics/import-and-export
